# Supplementary material
Source: HighWire-hosted journal article supplement (https://www.cmajopen.ca/highwire/filestream/81247/field_highwire_adjunct_files/0/2019-0094-1-at.pdf)

**Appendix 1 (as supplied by the authors): Supplemental information**

**Supplemental Table S1:** OHIP billing codes used to capture psychiatrist and PCP psychotherapy.

|                                          |                                                                                                                                   |
|------------------------------------------|-----------------------------------------------------------------------------------------------------------------------------------|
| Psychiatrist Psychotherapy Billing Codes | K197, K195, K208, K209, K203, K204, K205, K206, K192, K194 OR K198 (only counted if used $\geq 12$ times in a fiscal year period) |
| PCP Psychotherapy Billing Codes          | K197, K195, K208, K209, K203, K204, K205, K206, K192, K194                                                                        |

**Supplemental Figure S1:** Per Capita Supply of Psychiatrists by Local Health Integration Network (LHIN) in Ontario.

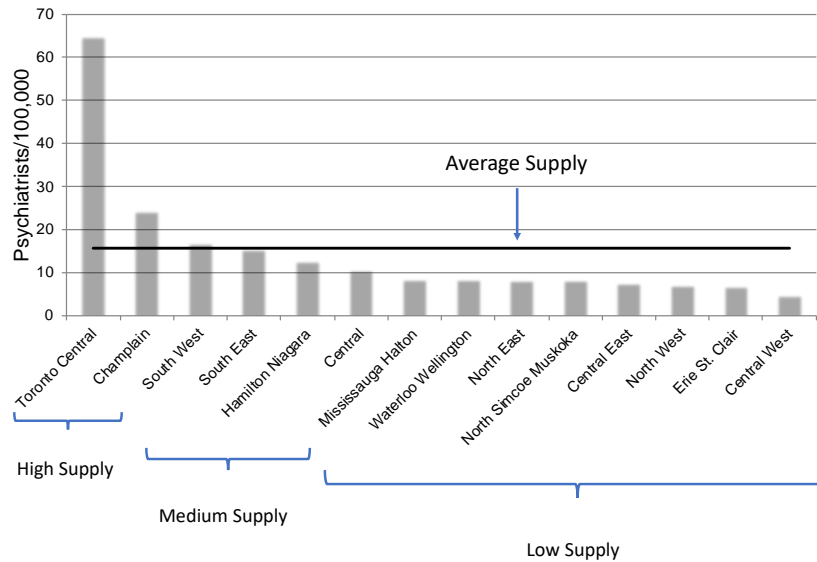

Supplement: 2019-0094-1-at.pdf [file 2019-0094-1-at.pdf]
